# Supplementary material for: Prevalence of Azole-Resistant Aspergillus Section Fumigati Strains Isolated from Romanian Vineyard Soil Samples
Source: MDPI journal article supplement (doi:10.3390/antibiotics12121695), 2023-12-03

**Supplementary Figure S2.** Serial microdilution on 96 well plate for 2 *Aspergillus* isolates. Determination of Minimum Inhibitory concentrations were conducted in quadruplicate for all isolates.

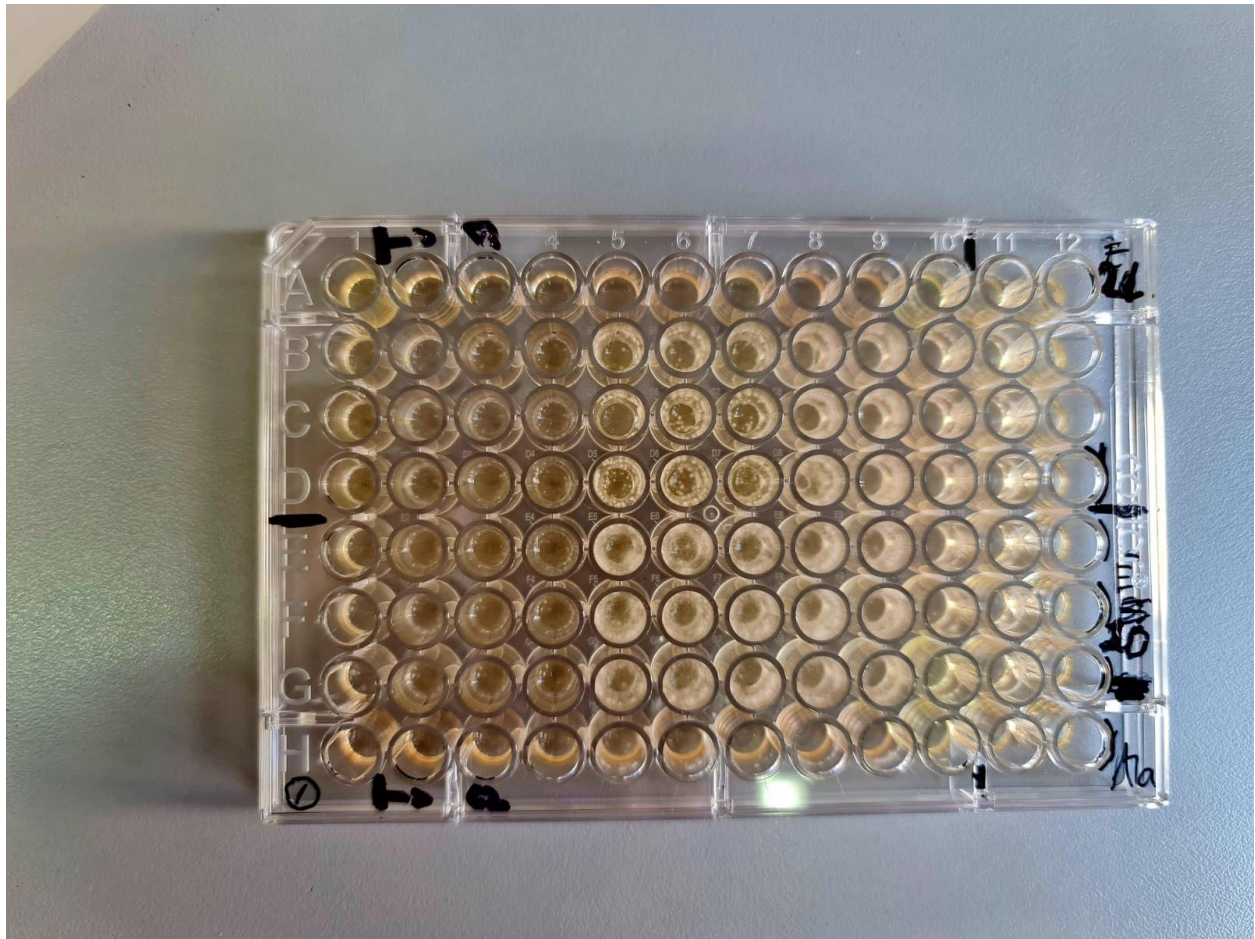

Supplement: s1 [file s1]
